# Supplementary material for: Bubble formation in catalyst pores; curse or blessing?
Source: Royal Society of Chemistry journal article supplement (doi:10.1039/c8re00110c), 2018-01-01
Supplement: c8re00110c1.pdf [file c8re00110c1.pdf]

Supporting information

**Bubble formation in catalyst pores; curse or blessing?**

Roger B. Espinosa<sup>a,c</sup>, Michel H.G. Duits<sup>b</sup>, Daniel Wijnperlé<sup>b</sup>, Frieder Mugele<sup>b</sup>, Leon Lefferts<sup>a\*</sup>

<sup>a</sup> Catalytic Processes and Materials, Faculty of Science and Technology, MESA+ Institute for Nanotechnology, University of Twente, P.O. Box 217, 7500 AE Enschede, Netherlands

<sup>b</sup> Physics of Complex Fluids, Faculty of Science and Technology, MESA+ Institute for Nanotechnology, University of Twente, P.O. Box 217, 7500 AE Enschede, Netherlands

<sup>c</sup> Present address: Beele Engineering, Vierde Broekdijk 12, 7122JD, Aalten, Netherlands.

\* Corresponding author, email: l.lefferts@utwente.nl

Table S1: Nanochannels studied and their characteristics.

| Nanochannel ID | Nanochannel length ( $\mu\text{m}$ ) | Nanochannel width ( $\mu\text{m}$ ) | Catalyst length ( $\mu\text{m}$ ) | Catalyst width ( $\mu\text{m}$ ) |
|----------------|--------------------------------------|-------------------------------------|-----------------------------------|----------------------------------|
| L1,1           | 2900                                 | 10                                  | 35                                | 6                                |
| L1,2           | 2900                                 | 30                                  | 35                                | 26                               |
| L1,3           | 2900                                 | 50                                  | 35                                | 46                               |
| L1,4           | 2900                                 | 70                                  | 35                                | 66                               |
| L1,5           | 2900                                 | 10                                  | 180                               | 6                                |
| L1,6           | 2900                                 | 30                                  | 180                               | 26                               |
| L1,7           | 2900                                 | 50                                  | 180                               | 46                               |
| L1,8           | 2900                                 | 70                                  | 180                               | 66                               |
| L1,9           | 2900                                 | 10                                  | 250                               | 6                                |
| L1,10          | 2900                                 | 30                                  | 250                               | 26                               |
| L1,11          | 2900                                 | 50                                  | 250                               | 46                               |
| L1,12          | 2900                                 | 70                                  | 250                               | 66                               |
| L2,1           | 8500                                 | 10                                  | 35                                | 6                                |
| L2,2           | 8500                                 | 30                                  | 35                                | 26                               |
| L2,3           | 8500                                 | 50                                  | 35                                | 46                               |
| L2,4           | 8500                                 | 70                                  | 35                                | 66                               |
| L2,5           | 8500                                 | 10                                  | 250                               | 6                                |
| L2,6           | 8500                                 | 30                                  | 250                               | 26                               |
| L2,7           | 8500                                 | 50                                  | 250                               | 46                               |
| L2,8           | 8500                                 | 70                                  | 250                               | 66                               |
| L2,9           | 8500                                 | 10                                  | 3140                              | 6                                |
| L2,10          | 8500                                 | 30                                  | 3140                              | 26                               |
| L2,11          | 8500                                 | 50                                  | 3140                              | 46                               |
| L2,12          | 8500                                 | 70                                  | 3140                              | 66                               |
| L3,1           | 14000                                | 10                                  | 35                                | 6                                |
| L3,2           | 14000                                | 30                                  | 35                                | 26                               |
| L3,3           | 14000                                | 50                                  | 35                                | 46                               |
| L3,4           | 14000                                | 70                                  | 35                                | 66                               |
| L3,5           | 14000                                | 10                                  | 250                               | 6                                |
| L3,6           | 14000                                | 30                                  | 250                               | 26                               |
| L3,7           | 14000                                | 50                                  | 250                               | 46                               |
| L3,8           | 14000                                | 70                                  | 250                               | 66                               |
| L3,9           | 14000                                | 10                                  | 3140                              | 6                                |
| L3,10          | 14000                                | 30                                  | 3140                              | 26                               |
| L3,11          | 14000                                | 50                                  | 3140                              | 46                               |
| L3,12          | 14000                                | 70                                  | 3140                              | 66                               |

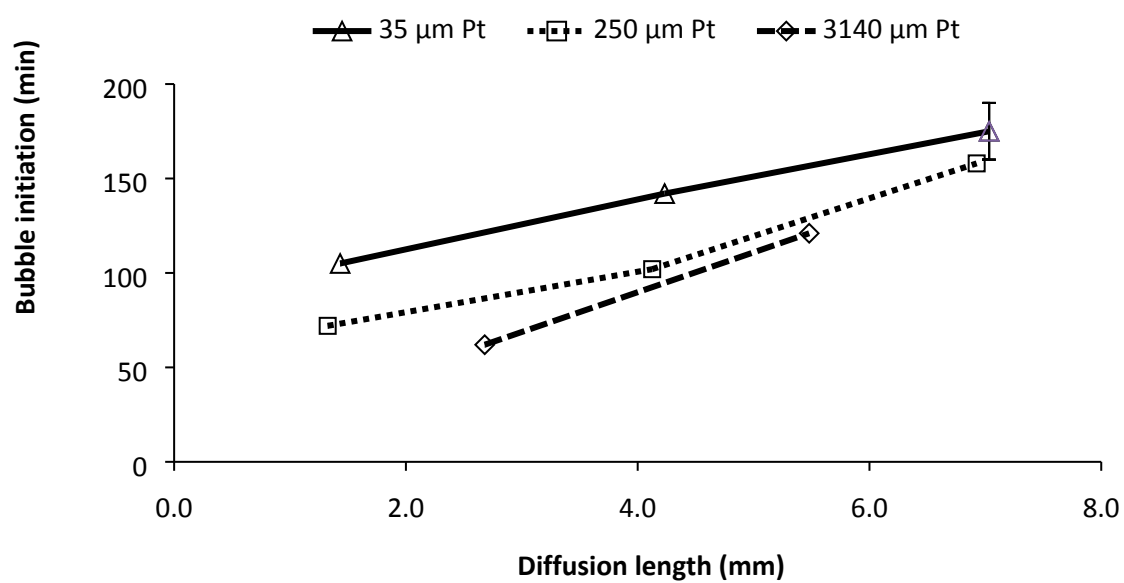

**Figure S1:** Effect of the diffusion length and the Pt length on the bubble initiation time for a constant nanochannel width of 50 μm and different platinum lengths (35, 250 and 3140 μm). The experiments were performed with 0.64 mole H<sub>2</sub>O<sub>2</sub>/L.

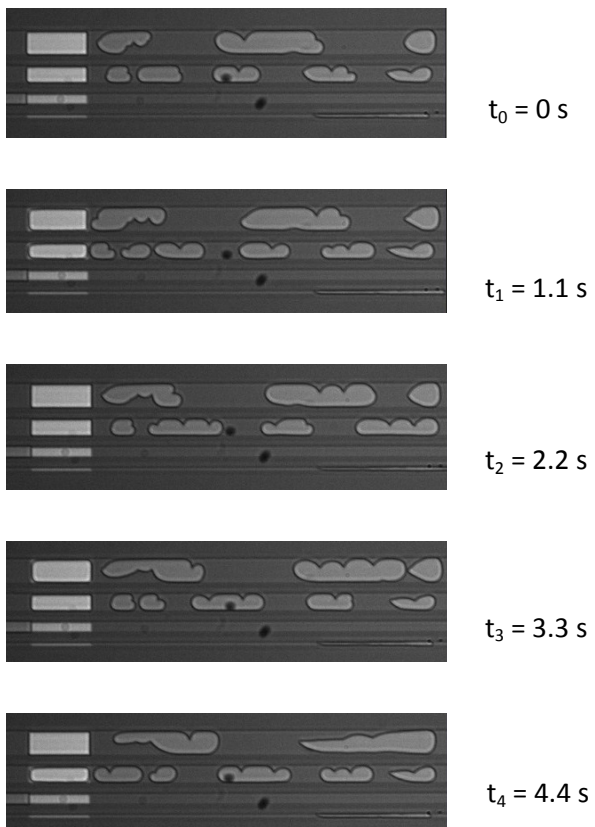

**Figure S2:** Evolution of the bubbles growing towards the microchannel filled with  $\text{H}_2\text{O}$  after 532 min of experiment. Images were taken every 1.1 second. Nanochannels have a length of 2.9 mm, widths of 10, 30, 50 and 70  $\mu\text{m}$  and a platinum length of 180  $\mu\text{m}$ . The experiment was performed with a solution of 0.64 mole  $\text{H}_2\text{O}_2/\text{L}$ .

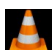

L4 ab  
32h40min\_7fps.avi

Movie S3. Real time movie of the experiment with a  $\text{H}_2\text{O}_2$  concentration of 1.49 mole/L, shown in table 1. Recording performed after 32h and 40min of reaction time.

## Calculation of H<sub>2</sub>O<sub>2</sub> conversion

The conversion of H<sub>2</sub>O<sub>2</sub> in the experiments with bubble formation towards the nanochannel filled with water (presence of convective flow) was calculated according to Equation F1:

$$\text{Conversion } H_2O_2 = \frac{H_2O_2 \text{ converted}}{H_2O_2 \text{ fed}} * 100 = \frac{2 * (V_{O_2,f} - V_{O_2,i})}{t_f - t_i} * \frac{P}{v * A * [H_2O_2]} * 100$$

Equation F1

Where  $V_{O_2,f}$  and  $V_{O_2,i}$  (m<sup>3</sup>) are the volumes of the oxygen bubble at times  $t_f$  and  $t_i$  (s) respectively; P is the pressure in the nanochannel (1 + ΔP bar), R (m<sup>3</sup> \* bar \* K<sup>-1</sup> \* mol<sup>-1</sup>) is the constant of ideal gases, T (K) is the temperature in the nanochannel, v (m \* s<sup>-1</sup>) is the linear velocity of the liquid in the nanochannel, A (m<sup>2</sup>) is the cross-sectional area of the nanochannel and [H<sub>2</sub>O<sub>2</sub>] (mole \* m<sup>-3</sup>) is the concentration of H<sub>2</sub>O<sub>2</sub> in the feed stream.
